# Supplementary material for: Continental hydroclimate during the late Paleocene-early Eocene in the central Rockies: insights from sedimentological and geochemical records preserved in the greater Green River Basin, southwestern Wyoming, U.S.A.
Source: Frontiers journal article supplement (doi:10.3389/feart.2025.1507500), 2025-07-22
Supplement: Data_Sheet_1.pdf [file Data_Sheet_1.pdf]

## **Supplementary Material for**

### **Continental hydroclimate during the late Paleocene-early Eocene in the central Rockies: insights from sedimentological and geochemical records preserved in the greater Green River Basin, southwestern Wyoming, U.S.A.**

Min Gao<sup>1,2,3\*</sup>, Majie Fan<sup>2</sup>, Guangsheng Zhuang<sup>4</sup> and Domenico Chiarella<sup>3</sup>

<sup>1</sup>Research Institute of Petroleum Exploration and Development, PetroChina, Beijing, China,

<sup>2</sup>Department of Earth and Environmental Sciences, The University of Texas at Arlington, Arlington, TX, United States,

<sup>3</sup>Department of Earth Sciences, Royal Holloway, University of London, Egham, United Kingdom,

<sup>4</sup>Department of Geology and Geophysics, Louisiana State University, Baton Rouge, LA, United States

## **Contents of this file**

Table S1 and Table S2

## **Introduction**

Table S1 contains all the bulk organic carbon isotope data used in the paper. The samples were collected following the field section as introduced in the “2 Geological background” section in the paper (Figure 2). Methods for collecting and processing the data are described in “3.2 Carbon and hydrogen isotope analysis” in the paper.

Table S2 shows the analyzed external standards used for calibrating our major elements weight percentage measurements of paleosol samples (see “3.4 MAP reconstruction” section in the paper).

**Table S1 Measured bulk organic carbon isotope ratios**

| <i>paleosol</i> |                 |                           | <i>mudstone</i> |                 |                           |
|-----------------|-----------------|---------------------------|-----------------|-----------------|---------------------------|
| Formation       | meter level (m) | $\delta^{13}\text{C}$ (‰) | Formation       | meter level (m) | $\delta^{13}\text{C}$ (‰) |
| Fort Union      | 208.0           | -24.0                     | Fort Union      | 0.0             | -26.1                     |
| Fort Union      | 208.5           | -25.2                     | Fort Union      | 3.2             | -25.2                     |
| Fort Union      | 212.7           | -24.0                     | Fort Union      | 44.0            | -24.2                     |
| Fort Union      | 214.0           | -25.4                     | Fort Union      | 53.0            | -24.8                     |
| Fort Union      | 218.0           | -24.4                     | Fort Union      | 158.0           | -25.4                     |
| Fort Union      | 219.0           | -25.0                     | Fort Union      | 170.0           | -25.9                     |
| Fort Union      | 270.0           | -24.7                     | Fort Union      | 170.5           | -26.1                     |
| Fort Union      | 271.0           | -25.1                     | Fort Union      | 171.5           | -26.0                     |
| Fort Union      | 285.5           | -23.7                     | Fort Union      | 176.0           | -25.9                     |
| Fort Union      | 286.5           | -23.2                     | Fort Union      | 181.0           | -24.7                     |
| Fort Union      | 287.0           | -24.6                     | Fort Union      | 183.5           | -25.9                     |
| Fort Union      | 288.5           | -24.7                     | Fort Union      | 185.0           | -25.5                     |
| Fort Union      | 289.0           | -24.9                     | Fort Union      | 207.5           | -24.7                     |
| Fort Union      | 291.5           | -24.7                     | Fort Union      | 211.3           | -25.8                     |
| Fort Union      | 293.0           | -24.7                     | Fort Union      | 212.0           | -25.2                     |
| Fort Union      | 293.5           | -25.3                     | Fort Union      | 215.0           | -22.8                     |
| Fort Union      | 298.0           | -25.2                     | Fort Union      | 215.5           | -25.9                     |
| Fort Union      | 348.0           | -26.0                     | Fort Union      | 220.0           | -25.7                     |
| Fort Union      | 365.5           | -25.5                     | Fort Union      | 221.0           | -24.7                     |
| Fort Union      | 367.0           | -25.4                     | Fort Union      | 221.8           | -24.8                     |
| Fort Union      | 367.5           | -25.1                     | Fort Union      | 222.5           | -24.3                     |
| Fort Union      | 405.2           | -24.7                     | Fort Union      | 271.5           | -24.8                     |
| Fort Union      | 406.0           | -24.8                     | Fort Union      | 278.0           | -22.9                     |
| Fort Union      | 406.8           | -24.8                     | Fort Union      | 279.0           | -23.1                     |
| Fort Union      | 445.5           | -24.8                     | Fort Union      | 279.5           | -22.8                     |
| Fort Union      | 446.5           | -24.8                     | Fort Union      | 282.2           | -24.8                     |
| Fort Union      | 447.0           | -25.0                     | Fort Union      | 283.0           | -25.1                     |
| Fort Union      | 447.5           | -25.6                     | Fort Union      | 284.5           | -24.3                     |
| Fort Union      | 455.5           | -24.8                     | Fort Union      | 328.0           | -24.6                     |
| Fort Union      | 456.0           | -26.3                     | Fort Union      | 345.5           | -23.0                     |
| Fort Union      | 467.0           | -25.7                     | Fort Union      | 346.0           | -24.8                     |
| Fort Union      | 467.5           | -25.5                     | Fort Union      | 349.3           | -24.3                     |
| Fort Union      | 486.0           | -24.9                     | Fort Union      | 369.0           | -25.1                     |

| <i>paleosol</i> |                 |                           | <i>mudstone</i> |                 |                           |
|-----------------|-----------------|---------------------------|-----------------|-----------------|---------------------------|
| Formation       | meter level (m) | $\delta^{13}\text{C}$ (‰) | Formation       | meter level (m) | $\delta^{13}\text{C}$ (‰) |
| Fort Union      | 487.0           | -25.6                     | Fort Union      | 369.5           | -23.1                     |
| Fort Union      | 496.0           | -23.8                     | Fort Union      | 426.5           | -24.7                     |
| Fort Union      | 498.0           | -26.0                     | Fort Union      | 448.0           | -23.9                     |
| Fort Union      | 570.0           | -23.7                     | Fort Union      | 448.5           | -23.9                     |
| Fort Union      | 572.5           | -24.7                     | Fort Union      | 449.5           | -25.2                     |
| Fort Union      | 573.0           | -26.5                     | Fort Union      | 450.0           | -24.2                     |
| Fort Union      | 573.5           | -25.4                     | Fort Union      | 451.0           | -25.2                     |
| Fort Union      | 606.5           | -25.1                     | Fort Union      | 457.5           | -23.5                     |
| Fort Union      | 607.0           | -26.0                     | Fort Union      | 459.0           | -24.1                     |
| Fort Union      | 609.0           | -24.5                     | Fort Union      | 460.5           | -24.6                     |
| Wasatch         | 1.0             | -25.3                     | Fort Union      | 484.0           | -23.1                     |
| Wasatch         | 2.0             | -26.8                     | Fort Union      | 485.0           | -25.4                     |
| Wasatch         | 6.0             | -25.6                     | Fort Union      | 485.5           | -23.9                     |
| Wasatch         | 6.5             | -25.3                     | Fort Union      | 489.0           | -23.7                     |
| Wasatch         | 7.0             | -26.3                     | Fort Union      | 490.0           | -25.0                     |
| Wasatch         | 8.0             | -25.1                     | Fort Union      | 491.5           | -25.2                     |
| Wasatch         | 12.0            | -25.1                     | Fort Union      | 494.7           | -25.4                     |
| Wasatch         | 12.5            | -25.1                     | Fort Union      | 501.5           | -23.0                     |
| Wasatch         | 14.0            | -26.5                     | Fort Union      | 504.5           | -23.9                     |
| Wasatch         | 14.5            | -24.5                     | Fort Union      | 506.0           | -23.1                     |
| Wasatch         | 15.0            | -25.6                     | Fort Union      | 530.5           | -23.6                     |
| Wasatch         | 17.5            | -25.9                     | Fort Union      | 531.0           | -23.8                     |
| Wasatch         | 18.0            | -25.1                     | Fort Union      | 531.5           | -24.4                     |
| Wasatch         | 18.5            | -26.2                     | Fort Union      | 574.0           | -23.6                     |
| Wasatch         | 19.0            | -25.9                     | Fort Union      | 574.8           | -23.2                     |
| Wasatch         | 19.5            | -25.8                     | Fort Union      | 612.5           | -24.6                     |
| Wasatch         | 68.8            | -25.0                     | Fort Union      | 613.3           | -24.3                     |
| Wasatch         | 72.0            | -28.5                     | Fort Union      | 614.0           | -24.4                     |
| Wasatch         | 72.5            | -25.7                     | Wasatch         | 10.5            | -25.7                     |
| Wasatch         | 73.3            | -26.7                     | Wasatch         | 23.5            | -25.4                     |
| Wasatch         | 74.8            | -26.2                     | Wasatch         | 59.2            | -26.5                     |
| Wasatch         | 75.5            | -25.9                     | Wasatch         | 68.8            | -24.9                     |
| Wasatch         | 77.0            | -26.3                     | Wasatch         | 69.5            | -25.0                     |
| Wasatch         | 77.7            | -25.6                     | Wasatch         | 70.3            | -25.0                     |
| Wasatch         | 78.5            | -25.7                     | Wasatch         | 71.0            | -26.2                     |

| <i>paleosol</i> |                 |                           | <i>mudstone</i> |                 |                           |
|-----------------|-----------------|---------------------------|-----------------|-----------------|---------------------------|
| Formation       | meter level (m) | $\delta^{13}\text{C}$ (‰) | Formation       | meter level (m) | $\delta^{13}\text{C}$ (‰) |
| Wasatch         | 79.2            | -25.8                     | Wasatch         | 71.8            | -25.8                     |
| Wasatch         | 79.5            | -28.2                     | Wasatch         | 73.5            | -25.5                     |
| Wasatch         | 79.8            | -28.3                     | Wasatch         | 73.8            | -25.8                     |
| Wasatch         | 82.3            | -27.0                     | Wasatch         | 74.0            | -25.8                     |
| Wasatch         | 83.8            | -28.3                     | Wasatch         | 74.3            | -25.8                     |
| Wasatch         | 83.8            | -25.1                     | Wasatch         | 74.5            | -26.4                     |
| Wasatch         | 84.0            | -28.3                     | Wasatch         | 74.8            | -26.5                     |
| Wasatch         | 86.3            | -26.0                     | Wasatch         | 75.0            | -25.8                     |
| Wasatch         | 86.5            | -26.3                     | Wasatch         | 75.3            | -26.0                     |
| Wasatch         | 86.8            | -26.0                     | Wasatch         | 75.5            | -26.5                     |
| Wasatch         | 87.0            | -28.3                     | Wasatch         | 75.8            | -25.7                     |
| Wasatch         | 87.5            | -28.0                     | Wasatch         | 76.0            | -27.2                     |
| Wasatch         | 87.8            | -25.0                     | Wasatch         | 76.3            | -25.9                     |
| Wasatch         | 88.3            | -26.4                     | Wasatch         | 76.5            | -25.3                     |
| Wasatch         | 90.5            | -27.1                     | Wasatch         | 77.0            | -26.3                     |
| Wasatch         | 90.5            | -28.2                     | Wasatch         | 77.3            | -25.8                     |
| Wasatch         | 91.3            | -27.5                     | Wasatch         | 77.8            | -26.1                     |
| Wasatch         | 92.0            | -27.3                     | Wasatch         | 78.5            | -26.0                     |
| Wasatch         | 93.0            | -27.5                     | Wasatch         | 78.8            | -26.2                     |
| Wasatch         | 94.3            | -26.1                     | Wasatch         | 78.9            | -22.5                     |
| Wasatch         | 94.5            | -25.3                     | Wasatch         | 80.0            | -25.4                     |
| Wasatch         | 94.8            | -26.0                     | Wasatch         | 80.3            | -25.3                     |
| Wasatch         | 97.3            | -25.1                     | Wasatch         | 80.5            | -25.4                     |
| Wasatch         | 98.8            | -25.0                     | Wasatch         | 82.3            | -25.5                     |
| Wasatch         | 99.0            | -24.0                     | Wasatch         | 82.5            | -26.3                     |
| Wasatch         | 101.5           | -27.6                     | Wasatch         | 82.8            | -26.1                     |
| Wasatch         | 106.5           | -26.8                     | Wasatch         | 83.0            | -25.3                     |
| Wasatch         | 107.9           | -25.1                     | Wasatch         | 83.3            | -26.2                     |
| Wasatch         | 109.6           | -25.2                     | Wasatch         | 83.5            | -26.5                     |
| Wasatch         | 110.3           | -25.8                     | Wasatch         | 84.3            | -26.4                     |
| Wasatch         | 111.8           | -27.8                     | Wasatch         | 84.5            | -26.6                     |
| Wasatch         | 115.4           | -28.7                     | Wasatch         | 85.3            | -26.5                     |
| Wasatch         | 115.7           | -27.5                     | Wasatch         | 86.7            | -26.5                     |
| Wasatch         | 117.2           | -27.5                     | Wasatch         | 87.3            | -24.6                     |
| Wasatch         | 120.1           | -25.8                     | Wasatch         | 89.5            | -27.2                     |

| <i>paleosol</i> |                 |                           | <i>mudstone</i> |                 |                           |
|-----------------|-----------------|---------------------------|-----------------|-----------------|---------------------------|
| Formation       | meter level (m) | $\delta^{13}\text{C}$ (‰) | Formation       | meter level (m) | $\delta^{13}\text{C}$ (‰) |
| Wasatch         | 120.8           | -25.5                     | Wasatch         | 90.0            | -26.5                     |
| Wasatch         | 121.6           | -27.1                     | Wasatch         | 90.9            | -26.2                     |
| Wasatch         | 122.3           | -25.0                     | Wasatch         | 91.5            | -26.7                     |
| Wasatch         | 122.5           | -27.9                     | Wasatch         | 91.8            | -26.9                     |
| Wasatch         | 122.8           | -29.4                     | Wasatch         | 92.3            | -26.1                     |
| Wasatch         | 123.0           | -25.5                     | Wasatch         | 92.5            | -25.2                     |
| Wasatch         | 123.8           | -25.3                     | Wasatch         | 92.8            | -26.0                     |
| Wasatch         | 125.8           | -24.7                     | Wasatch         | 93.3            | -24.9                     |
| Wasatch         | 126.5           | -25.5                     | Wasatch         | 93.5            | -26.3                     |
| Wasatch         | 127.2           | -25.0                     | Wasatch         | 93.8            | -25.4                     |
| Wasatch         | 128.8           | -26.4                     | Wasatch         | 94.8            | -24.8                     |
| Wasatch         | 131.3           | -24.7                     | Wasatch         | 95.5            | -26.0                     |
| Wasatch         | 131.8           | -26.2                     | Wasatch         | 96.3            | -24.9                     |
| Wasatch         | 132.0           | -26.3                     | Wasatch         | 97.0            | -24.5                     |
| Wasatch         | 132.3           | -24.6                     | Wasatch         | 97.7            | -25.7                     |
| Wasatch         | 132.5           | -27.8                     | Wasatch         | 98.0            | -27.2                     |
| Wasatch         | 133.0           | -28.4                     | Wasatch         | 98.3            | -24.0                     |
| Wasatch         | 138.5           | -27.8                     | Wasatch         | 98.5            | -26.7                     |
| Wasatch         | 138.8           | -27.3                     | Wasatch         | 99.3            | -25.5                     |
| Wasatch         | 139.0           | -28.1                     | Wasatch         | 99.5            | -25.8                     |
| Wasatch         | 140.8           | -27.2                     | Wasatch         | 100.3           | -24.9                     |
| Wasatch         | 145.7           | -25.5                     | Wasatch         | 100.7           | -25.2                     |
| Wasatch         | 147.7           | -25.5                     | Wasatch         | 100.8           | -25.4                     |
| Wasatch         | 148.3           | -25.9                     | Wasatch         | 101.0           | -25.0                     |
| Wasatch         | 164.2           | -26.0                     | Wasatch         | 101.3           | -23.6                     |
| Wasatch         | 165.0           | -26.0                     | Wasatch         | 101.8           | -25.5                     |
| Wasatch         | 165.8           | -26.8                     | Wasatch         | 105.7           | -22.9                     |
| Wasatch         | 167.3           | -26.8                     | Wasatch         | 106.5           | -26.2                     |
| Wasatch         | 168.0           | -27.3                     | Wasatch         | 106.8           | -25.2                     |
| Wasatch         | 168.8           | -27.3                     | Wasatch         | 109.8           | -26.1                     |
| Wasatch         | 169.5           | -25.1                     | Wasatch         | 110.0           | -26.5                     |
| Wasatch         | 177.0           | -26.0                     | Wasatch         | 110.3           | -26.3                     |
| Wasatch         | 186.2           | -26.5                     | Wasatch         | 112.0           | -26.5                     |
| Wasatch         | 194.5           | -24.4                     | Wasatch         | 112.3           | -26.4                     |
| Wasatch         | 196.7           | -25.8                     | Wasatch         | 112.5           | -26.6                     |

| <i>paleosol</i> |                 |                           | <i>mudstone</i> |                 |                           |
|-----------------|-----------------|---------------------------|-----------------|-----------------|---------------------------|
| Formation       | meter level (m) | $\delta^{13}\text{C}$ (‰) | Formation       | meter level (m) | $\delta^{13}\text{C}$ (‰) |
| Wasatch         | 197.5           | -27.0                     | Wasatch         | 112.8           | -25.8                     |
| Wasatch         | 201.8           | -25.5                     | Wasatch         | 113.0           | -26.9                     |
| Wasatch         | 202.5           | -26.0                     | Wasatch         | 113.3           | -26.8                     |
| Wasatch         | 203.2           | -26.8                     | Wasatch         | 115.9           | -26.4                     |
| Wasatch         | 204.0           | -26.5                     | Wasatch         | 116.2           | -26.7                     |
| Wasatch         | 205.5           | -26.8                     | Wasatch         | 116.4           | -26.4                     |
| Wasatch         | 207.0           | -27.3                     | Wasatch         | 116.7           | -26.1                     |
| Wasatch         | 213.5           | -25.4                     | Wasatch         | 116.9           | -25.3                     |
| Wasatch         | 214.3           | -25.8                     | Wasatch         | 117.7           | -26.4                     |
| Wasatch         | 220.0           | -25.4                     | Wasatch         | 118.4           | -25.1                     |
| Wasatch         | 220.8           | -25.4                     | Wasatch         | 118.9           | -26.2                     |
| Wasatch         | 243.8           | -27.0                     | Wasatch         | 122.0           | -25.0                     |
| Wasatch         | 245.3           | -26.2                     | Wasatch         | 123.1           | -25.9                     |
| Wasatch         | 246.8           | -25.8                     | Wasatch         | 123.8           | -27.0                     |
| Wasatch         | 302.0           | -25.1                     | Wasatch         | 124.0           | -26.1                     |
| Wasatch         | 302.7           | -26.4                     | Wasatch         | 124.3           | -26.2                     |
| Wasatch         | 303.5           | -24.9                     | Wasatch         | 124.8           | -25.4                     |
| Wasatch         | 304.2           | -26.1                     | Wasatch         | 125.0           | -25.8                     |
| Wasatch         | 305.0           | -26.7                     | Wasatch         | 125.3           | -25.9                     |
| Wasatch         | 305.8           | -25.0                     | Wasatch         | 125.5           | -26.3                     |
| Wasatch         | 306.5           | -25.7                     | Wasatch         | 125.9           | -25.8                     |
| Wasatch         | 307.3           | -26.1                     | Wasatch         | 126.8           | -25.7                     |
| Wasatch         | 308.0           | -25.1                     | Wasatch         | 127.0           | -25.5                     |
| Wasatch         | 308.7           | -27.0                     | Wasatch         | 127.3           | -25.5                     |
| Wasatch         | 309.5           | -24.9                     | Wasatch         | 127.5           | -26.4                     |
| Wasatch         | 311.7           | -26.6                     | Wasatch         | 132.8           | -26.6                     |
| Wasatch         | 312.5           | -26.2                     | Wasatch         | 135.2           | -24.2                     |
| Wasatch         | 313.3           | -26.5                     | Wasatch         | 137.5           | -25.8                     |
| Wasatch         | 314.0           | -26.2                     | Wasatch         | 138.3           | -26.4                     |
| Wasatch         | 328.0           | -26.3                     | Wasatch         | 139.7           | -24.5                     |
| Wasatch         | 328.3           | -26.1                     | Wasatch         | 140.3           | -24.6                     |
| Wasatch         | 328.7           | -26.4                     | Wasatch         | 141.3           | -25.7                     |
| Wasatch         | 329.1           | -26.6                     | Wasatch         | 153.0           | -26.5                     |
| Wasatch         | 329.5           | -25.7                     | Wasatch         | 155.0           | -26.7                     |
| Wasatch         | 365.0           | -25.6                     | Wasatch         | 174.0           | -26.9                     |

| <i>paleosol</i> |                 |                           | <i>mudstone</i> |                 |                           |
|-----------------|-----------------|---------------------------|-----------------|-----------------|---------------------------|
| Formation       | meter level (m) | $\delta^{13}\text{C}$ (‰) | Formation       | meter level (m) | $\delta^{13}\text{C}$ (‰) |
| Wasatch         | 366.0           | -26.4                     | Wasatch         | 176.3           | -24.4                     |
| Wasatch         | 366.5           | -27.4                     | Wasatch         | 187.0           | -25.1                     |
| Wasatch         | 367.0           | -26.1                     | Wasatch         | 187.8           | -25.1                     |
| Wasatch         | 367.5           | -25.9                     | Wasatch         | 188.5           | -25.4                     |
| Wasatch         | 368.0           | -25.9                     | Wasatch         | 190.0           | -26.0                     |
| Wasatch         | 390.5           | -27.4                     | Wasatch         | 190.7           | -25.4                     |
| Wasatch         | 391.0           | -25.9                     | Wasatch         | 191.5           | -25.9                     |
| Wasatch         | 391.5           | -25.5                     | Wasatch         | 193.0           | -24.9                     |
| Wasatch         | 392.5           | -25.9                     | Wasatch         | 193.7           | -24.4                     |
| Wasatch         | 393.5           | -25.4                     | Wasatch         | 209.0           | -26.5                     |
| Wasatch         | 404.0           | -26.6                     | Wasatch         | 209.8           | -23.4                     |
| Wasatch         | 405.0           | -26.0                     | Wasatch         | 210.5           | -25.2                     |
| Wasatch         | 406.0           | -26.4                     | Wasatch         | 212.0           | -24.7                     |
| Wasatch         | 406.5           | -26.4                     | Wasatch         | 215.8           | -25.0                     |
| Wasatch         | 407.0           | -26.1                     | Wasatch         | 217.3           | -24.9                     |
| Wasatch         | 407.5           | -25.9                     | Wasatch         | 222.3           | -26.0                     |
| Wasatch         | 408.0           | -26.8                     | Wasatch         | 288.0           | -24.0                     |
| Wasatch         | 408.5           | -26.3                     | Wasatch         | 311.0           | -24.7                     |
| Wasatch         | 410.0           | -26.1                     | Wasatch         | 326.5           | -24.2                     |
| Wasatch         | 410.5           | -27.2                     | Wasatch         | 326.9           | -25.8                     |
| Wasatch         | 416.0           | -25.7                     | Wasatch         | 327.3           | -25.9                     |
| Wasatch         | 424.0           | -25.9                     | Wasatch         | 330.2           | -26.9                     |
| Wasatch         | 424.5           | -26.5                     | Wasatch         | 378.5           | -24.3                     |
| Wasatch         | 425.0           | -26.3                     | Wasatch         | 398.0           | -23.8                     |
| Wasatch         | 426.0           | -27.0                     | Wasatch         | 399.0           | -24.8                     |
| Wasatch         | 427.0           | -25.7                     | Wasatch         | 401.0           | -24.7                     |
| Wasatch         | 427.5           | -24.8                     | Wasatch         | 403.5           | -23.3                     |
| Wasatch         | 428.0           | -25.0                     | Wasatch         | 411.0           | -23.6                     |
| Wasatch         | 429.0           | -26.1                     | Wasatch         | 440.5           | -24.7                     |
| Wasatch         | 446.0           | -27.3                     | Wasatch         | 461.5           | -25.6                     |
| Wasatch         | 448.0           | -27.1                     | Wasatch         | 473.0           | -24.0                     |
| Wasatch         | 448.5           | -27.1                     | Wasatch         | 474.5           | -26.2                     |
| Wasatch         | 449.0           | -27.2                     | Wasatch         | 487.0           | -26.8                     |
| Wasatch         | 449.5           | -27.3                     | Wasatch         | 490.0           | -24.5                     |
| Wasatch         | 450.0           | -27.0                     | Wasatch         | 492.5           | -25.5                     |

| <i>paleosol</i> |                 |                           | <i>mudstone</i> |                 |                           |
|-----------------|-----------------|---------------------------|-----------------|-----------------|---------------------------|
| Formation       | meter level (m) | $\delta^{13}\text{C}$ (‰) | Formation       | meter level (m) | $\delta^{13}\text{C}$ (‰) |
| Wasatch         | 456.5           | -26.0                     | Wasatch         | 493.5           | -25.6                     |
| Wasatch         | 461.0           | -27.0                     | Wasatch         | 496.0           | -27.0                     |
| Wasatch         | 468.5           | -26.5                     | Wasatch         | 499.0           | -26.5                     |
| Wasatch         | 469.5           | -26.0                     | Wasatch         | 507.0           | -25.6                     |
| Wasatch         | 471.0           | -25.1                     | Wasatch         | 548.2           | -23.5                     |
| Wasatch         | 491.0           | -27.0                     | Wasatch         | 549.0           | -26.3                     |
| Wasatch         | 491.5           | -27.5                     | Wasatch         | 550.5           | -24.2                     |
| Wasatch         | 495.0           | -25.3                     | Wasatch         | 555.0           | -25.5                     |
| Wasatch         | 495.5           | -28.5                     | Wasatch         | 556.5           | -25.8                     |
| Wasatch         | 500.0           | -26.4                     | Wasatch         | 562.5           | -23.0                     |
| Wasatch         | 501.0           | -26.7                     | Wasatch         | 563.2           | -24.1                     |
| Wasatch         | 564.0           | -26.5                     | Wasatch         | 565.5           | -26.6                     |
| Wasatch         | 573.0           | -25.3                     | Wasatch         | 571.5           | -26.8                     |
| Wasatch         | 574.5           | -25.5                     | Wasatch         | 579.0           | -26.0                     |
| Wasatch         | 576.0           | -27.4                     | Wasatch         | 582.0           | -25.5                     |
| Wasatch         | 580.5           | -26.2                     | Wasatch         | 583.5           | -25.1                     |
| Wasatch         | 585.0           | -27.9                     | Wasatch         | 584.3           | -25.3                     |
| Wasatch         | 586.5           | -26.6                     | Wasatch         | 588.8           | -26.2                     |
| Wasatch         | 637.2           | -26.8                     | Wasatch         | 589.5           | -26.6                     |
| Wasatch         | 642.5           | -26.8                     | Wasatch         | 590.3           | -25.5                     |
| Wasatch         | 643.2           | -26.9                     | Wasatch         | 591.8           | -26.3                     |
|                 |                 |                           | Wasatch         | 592.5           | -25.6                     |
|                 |                 |                           | Wasatch         | 627.0           | -26.9                     |
|                 |                 |                           | Wasatch         | 628.5           | -26.5                     |
|                 |                 |                           | Wasatch         | 631.5           | -25.7                     |
|                 |                 |                           | Wasatch         | 636.5           | -25.6                     |
|                 |                 |                           | Wasatch         | 638.0           | -26.6                     |
|                 |                 |                           | Wasatch         | 638.7           | -26.5                     |
|                 |                 |                           | Wasatch         | 639.5           | -26.9                     |
|                 |                 |                           | Wasatch         | 640.0           | -26.9                     |
|                 |                 |                           | Wasatch         | 641.0           | -26.9                     |
|                 |                 |                           | Wasatch         | 644.0           | -27.0                     |
|                 |                 |                           | Wasatch         | 645.5           | -27.0                     |



**Table S2 Analyzed external standards used for calibration curve in Shimadzu EDX-7000 analyses of shales**

|                                | <i>Certified/Preferred Values<sup>a</sup></i> |       |       | <i>Average (N = 5)<sup>b</sup></i> |         |       |         |       |         | <i>Standard Deviation (N = 5)<sup>c</sup></i> |       |       | <i>RSD (%)<sup>d</sup></i> |       |       |
|--------------------------------|-----------------------------------------------|-------|-------|------------------------------------|---------|-------|---------|-------|---------|-----------------------------------------------|-------|-------|----------------------------|-------|-------|
|                                | SDO-I                                         | SBC-I | SGR-I | SDO-I                              | % error | SBC-I | % error | SGR-I | % error | SDO-I                                         | SBC-I | SGR-I | SDO-I                      | SBC-I | SGR-I |
| Na <sub>2</sub> O              | 0.38                                          | 0.15  | 2.99  | 0.12                               | 69.21   | 0.18  | 17.33   | 0.41  | 86.25   | 0.03                                          | 0.03  | 0.03  | 22.22                      | 14.20 | 7.06  |
| MgO                            | 1.54                                          | 2.6   | 4.44  | 1.34                               | 13.31   | 2.56  | 0.83    | 4.45  | 0.29    | 0.17                                          | 0.19  | 0.21  | 13.03                      | 7.45  | 4.72  |
| Al <sub>2</sub> O <sub>3</sub> | 12.27                                         | 21    | 6.52  | 12.49                              | 1.80    | 20.92 | 1.27    | 6.28  | 3.68    | 0.02                                          | 0.01  | 0.02  | 0.13                       | 0.06  | 0.33  |
| SiO <sub>2</sub>               | 49.28                                         | 47.64 | 28.2  | 48.87                              | 0.83    | 47.73 | 0.31    | 29.26 | 3.75    | 0.27                                          | 0.26  | 0.21  | 0.55                       | 0.55  | 0.70  |
| K <sub>2</sub> O               | 3.35                                          | 3.45  | 1.66  | 3.27                               | 2.39    | 3.54  | 5.66    | 1.71  | 2.89    | 0.04                                          | 0.04  | 0.03  | 1.16                       | 1.07  | 1.70  |
| CaO                            | 1.05                                          | 2.95  | 8.38  | 1.46                               | 39.05   | 2.63  | 3.87    | 8.35  | 0.32    | 0.001                                         | 0.001 | 0.000 | 0.068                      | 0.038 | 0.000 |
| TiO <sub>2</sub>               | 0.71                                          | 0.855 | 0.253 | 0.72                               | 0.70    | 0.85  | 2.37    | 0.26  | 1.98    | 0.02                                          | 0.03  | 0.01  | 3.36                       | 3.30  | 4.65  |
| Fe <sub>2</sub> O <sub>3</sub> | 9.34                                          | 9.71  | 3.03  | 9.25                               | 0.99    | 9.79  | 2.61    | 3.05  | 0.59    | 0.02                                          | 0.02  | 0.01  | 0.26                       | 0.25  | 0.43  |

<sup>a</sup>USGS standards SDO-I (Devonian Ohio Shale), SBC-I (Brush Creek Shale), and SGR-I (Green River Shale) were used.

<sup>b</sup>Accuracy: All of the results from the different runs are averaged here and their accuracy relative to their standard reference values is reported as % error. The percentage error for each element is calculated:

$$\%error = \frac{\text{Difference between measured and certified concentration}}{\text{Certified concentration of the element}} \times 100$$

<sup>c</sup>Standard Deviation: The standard deviation is calculated, where  $\bar{x}$  is the average concentration,  $x$  is the element concentration, and  $n$  is the number of measurements, as follows:

$$\sigma = \sqrt{\frac{\sum (x - \bar{x})^2}{n - 1}}$$

<sup>d</sup>Precision: the precision of a sample with respect to each element is represented by the relative standard deviation (RSD), calculated as follows:

$$RSD(\%) = \frac{100\sigma}{\bar{x}}$$
